# Supplementary material for: Layer-by-layer coated nanoliposomes for oral delivery of insulin
Source: Royal Society of Chemistry journal article supplement (doi:10.1039/d0nr06104b), 2020-11-11
Supplement: d0nr06104b1.pdf [file d0nr06104b1.pdf]

## Electronic Supplementary Information (ESI)

for

### Layer-by-Layer Coated Nanoliposome for Oral Delivery of Insulin

Yiming Zhang<sup>a</sup>, Gordon Minru Xiong<sup>a</sup>, Yusuf Ali<sup>b</sup>, Bernhard O. Boehm<sup>b</sup>, Ying Ying Huang<sup>a,\*</sup>, Subbu Venkatraman<sup>a,\*</sup>

a. School of Materials Science and Engineering, Nanyang Technological University, Blk N4.1, Nanyang Avenue, Singapore 639798

b. Lee Kong Chian School of Medicine, Clinical Sciences Building, 11 Mandalay Road, Singapore 308232

\* Corresponding authors. Tel.: +65 6316 8976; fax: +65 6790 9081. E-mail address:

yingyinghuang@ntu.edu.sg (Yingying Huang), assubbu@ntu.edu.sg (S.S. Venkatraman)

Keywords: Layer-by-Layer nanoparticles, nanoliposomes, oral insulin delivery, diabetes mellitus, chitosan

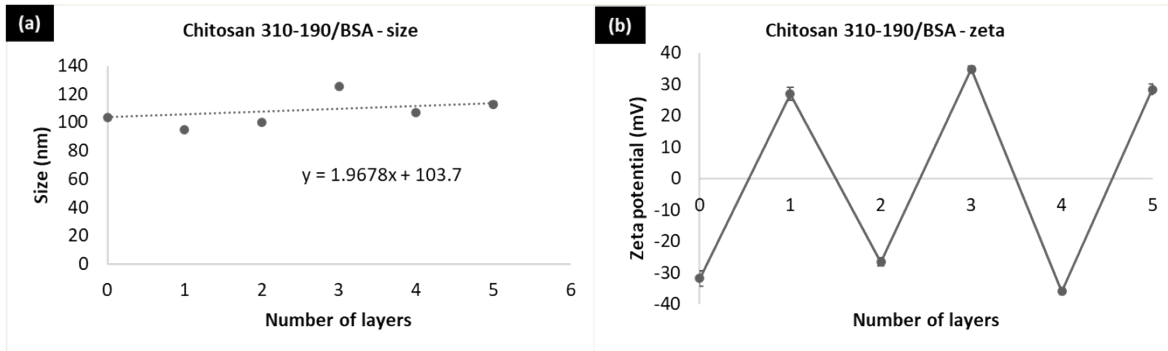

**Figure 1.** Extended application of the LbL coating technique on another model protein Bovine Serum Albumin (BSA). Effect of increasing coating layers of chitosan 310-190/BSA on (a) hydrodynamic size and (b) zeta potential

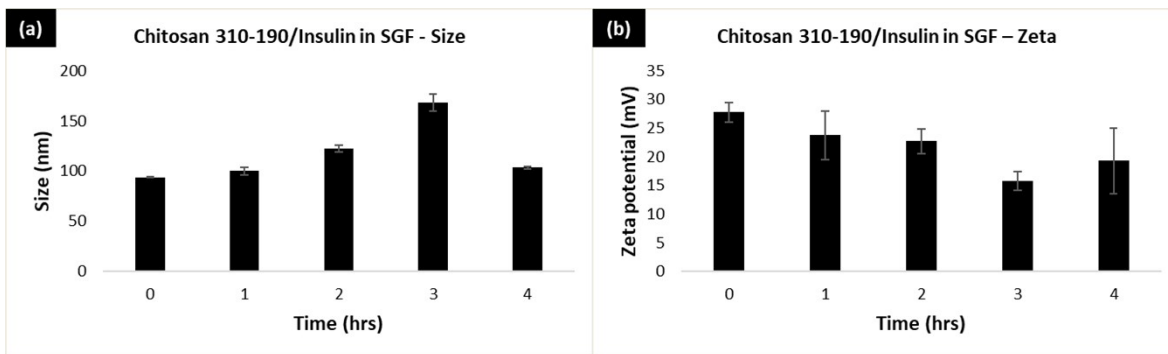

**Figure 2.** (a) hydrodynamic size and (b) zeta potential of 11 layers LbL coated liposome in SGF pH 1.2.

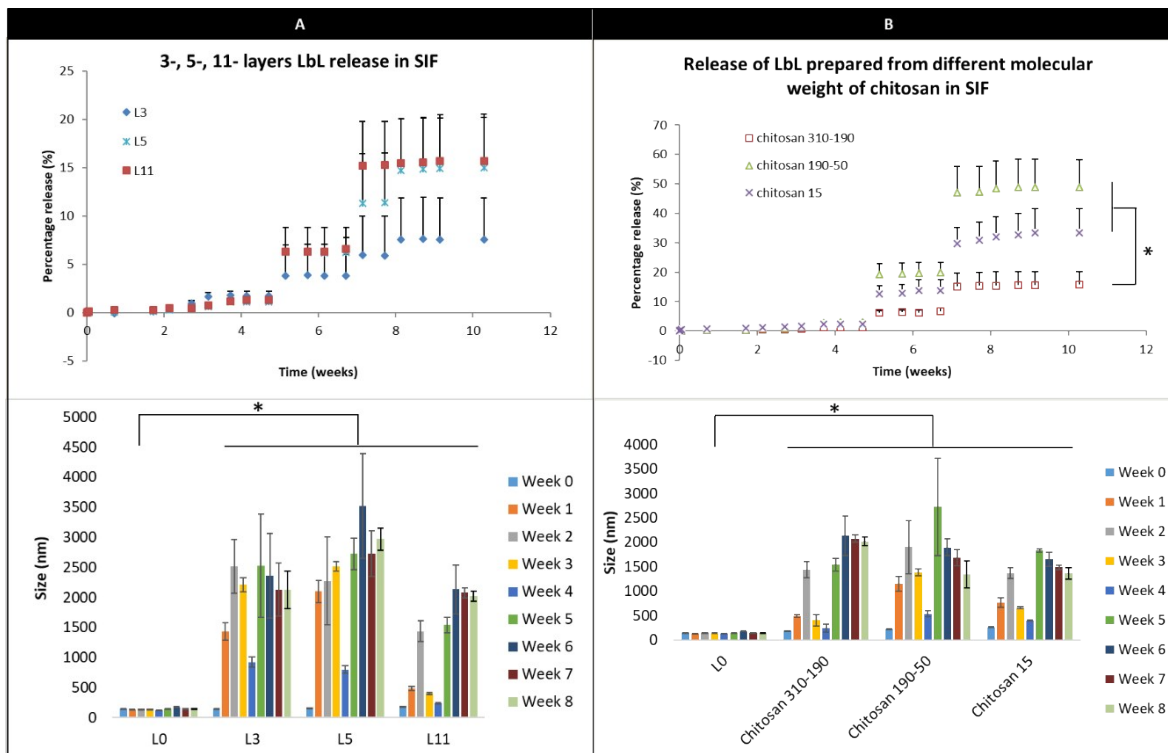

**Figure 3.** Effect of increasing coating layers and polymer length on LbL release and stability in SIF pH 6.8 at 37°C. (A) comparison of release and stability of 3, 5, and 11 layers of chitosan 310-190/insulin coated LbL liposome in SIF pH 6.8 at

37°C. (B) Release and stability of 11 layers of LbL fabricated with different molecular weight of chitosan/insulin in SIF pH 6.8 at 37°C. DLS was used to measure the particle size. The data is represented by mean  $\pm$  standard deviation (n = 3, \*P < 0.05).

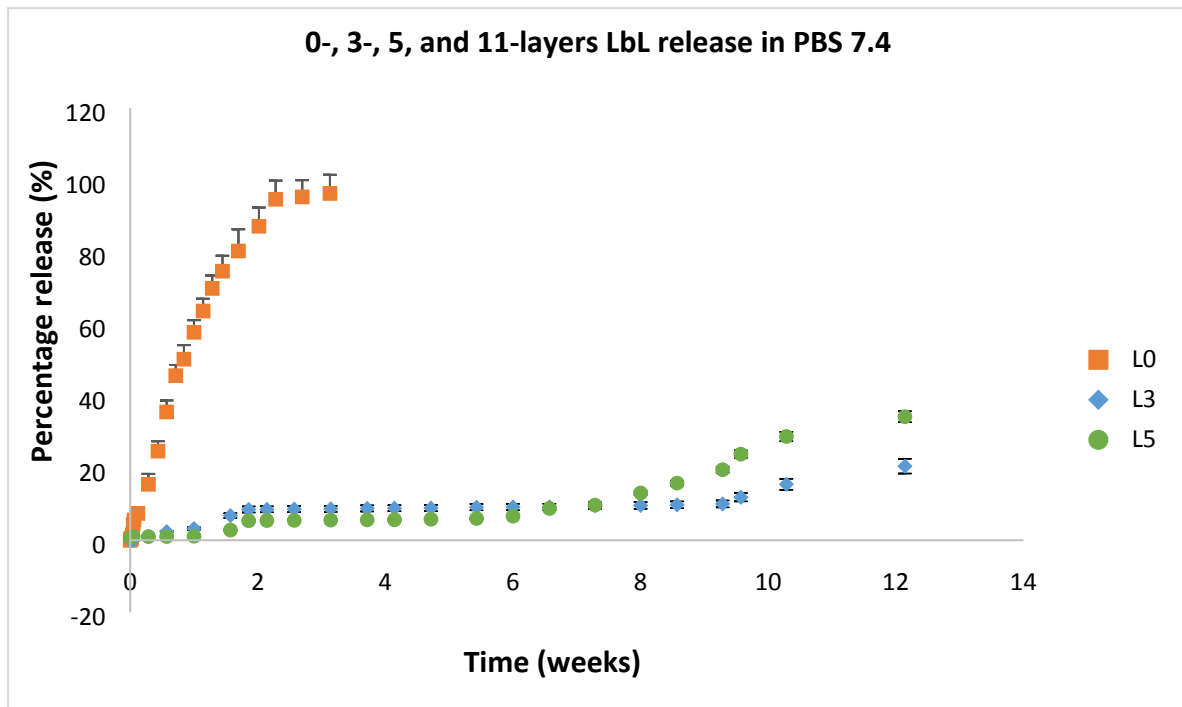

**Figure 4.** Release profile of LbL in PBS pH 7.4 at 37°C over 12 weeks. Comparison between release of 3 and 5 layers of chitosan 310-190/insulin coated LbL liposome and insulin loaded HSPC/DPPG liposome core (L0).
